# Supplementary material for: A palladium catalysed cyclisation–carbonylation of bromodienes: control in carbonylation over facile β-hydride eliminationElectronic supplementary information (ESI) available: experimental. See http://www.rsc.org/suppdata/cc/b2/b201311h/
Source: Royal Society of Chemistry journal article supplement (doi:10.1039/b201311h), 2002-04-04
Supplement: b201311h.doc [file b201311h.doc]

**Supplementary data**

**A Palladium Catalysed Cyclisation-Carbonylation of Bromo-dienes: Control in Carbonylation over Facile -Hydride Elimination.**

**Varinder K. Aggarwal, Paul W. Davies and Bill Moss**

Experimental

General

Flash chromatography was performed on silica gel (Merck Kiesegel 60). TLC was performed on aluminium backed silica plates (60F254) which were developed using standard visualizing agents: UV fluorescence (254 and 366 nm), molybdic acid /∆, anisaldehyde / ∆, permanganate /∆. Melting points were determined on a Khöfler hot stage. Infrared spectra were recorded on a Perkin-Elmer Spectrum One FT-IR spectrometer. Only selected absorbencies (max) are reported. 1H NMR spectra were recorded at 250, 270 or 400 MHz on Bruker AC-250, Jeol Delta GX/270 or Jeol Delta GX/400 instruments, respectively. Chemical shifts (H) are quoted in parts per million (ppm), referenced to TMS, *J* values are given in Hz. 13C NMR spectra were recorded at 63, 67 or 101 MHz on Bruker AC-250, Delta GX/270 or Delta GX/400 instruments, respectively. Chemical shifts (C) are quoted in parts per million (ppm), referenced to the appropriate residual solvent peak. Degenerate peaks are prefixed by the number of carbons. Low resolution mass spectra (*m/z*) were recorded on a Micromass Analytical Autospec spectrometer with only molecular ions M+ and major peaks being reported with intensities quoted as percentages of the base peak. High-resolution mass spectra were recorded on a Micromass Analytical Autospec spectrometer. Glassware was dried in the oven over night, put under vacuum and heated with a heat gun and allowed to cool to ambient temperature under nitrogen. All chemicals were purchased from Aldrich, Fluka or Lancaster, and used as delivered. DMF and MeOH were purchased as anhydrous solvents from Aldrich chemical company. Triethylamine was dried over calcium hydride and then distilled from calcium hydride. THF and DCM were pre-dried over sodium wire and then purified by passing through a solvent column prior to use. The solvent column is composed of activated alumina (A-2). See: A. B. Pangborn, M. A. Giardello, R. H. Grubbs, R. K. Rosen, F. J. Timmers, *Organometallics*, 1996, **15**, 1518. Reactions at elevated pressure were carried out in an Intek MR7 reactor vessel.

### Diethylallylmalonate

Sodium hydride (50% dispersion in oil, 2.16 g, 45.0 mmol) was added portionwise to a stirred solution of diethyl malonate (9.1 mL, 60 mmol) and allyl bromide (3.0 mL, 30 mmol) in anhydrous DMF (20 mL) and THF (60 mL) at ambient temperature under an argon atmosphere. The solution was heated to reflux for 1 h and then allowed to cool to ambient temperature. Hexanes (100 mL) and water (100 mL) were added to the mixture and the layers seperated. The aqueous layer was extracted with a mixture of diethyl ether and hexane (1:1, 3 x 40 mL). Organic extracts were combined, dried over magnesium sulfate, filtered and the solvent removed under reduced pressure. The residue was purified by column chromatography eluting in diethyl ether/hexanes (3:7) yielding the esteras a colourless oil1 (4.84 g, 24.2 mmol, 81%), Rf 0.40 (EtOAc:Hexanes, 3:7); (250 MHz; CDCl3)1.25 (6H, t, *J* 7.1, C*H*2CH3), 2.63 (2H, ddt, *J* 7.7, 6.8 and 1.2, CHC*H*2), 3.41 (1H, t, *J* 7.7, CH), 4.19 (4H, qd, *J* 7.1 and 0.5, CH3), 5.05 (1H, ddt, *J* 10.1, 1.3 and 1.2, CH=CH*H*), 5.11 (1H, m, CH=C*H*H), 5.77 (1H, ddt, *J* 16.9, 10.1 and 6.8, C*H*=CH2); *m/z* (CI) 201 (M+H+, 23%), 173 (15), 155 (40), 127 (37), 109 (100).

### Allyl-2-(2-bromo-allyl)-malonic acid diethyl ester 1a

2-Allyl-malonic acid diethyl ether (2.17 mL, 11.0 mmol) was slowly added to a solution of freshly prepared sodium ethoxide (12.0 mmol) in ethanol (25 mL), with stirring, at 0oC. The solution was then left to stir at ambient temperature for 15 min. 2,3-Dibromoprop-1-ene (1.25 mL, 12.8 mmol) was added dropwise over a 10 minute period and the resulting solution was heated to reflux overnight. The solution was allowed to cool to ambient temperature and water (50 mL) was added. The solution was then extracted with diethyl ether (2 x 25 mL), dried over magnesium sulfate, filtered and the solvent removed under reduced pressure. The residue was purified by column chromatography eluting with diethyl ether/hexane (30:70) yielding the bromodieneas a colourless oil2 (3.12 g, 9.80 mmol, 89%), RfDiethylether:hexanes(250 MHz; CDCl3)1.24 (6H, t, *J* 7.1, 2C*H*3), 2.75 (2H, dt, *J* 7.3 and 1.2, CHC*H*2), 3.12 (2H, d, *J* 0.6, BrCCH2), 4.18 (4H, ddq, *J* 16.5, 10.8 and 7.1, C*H*2CH3), 5.10 (1H, ddd, *J* 10.2, 1.6 and 1.5, CH=CH*H*), 5.11 (1H, ddd, *J* 17.1, 3.2 and 1.6, CH=C*H*H), 5.57 (1H, d, *J* 1.8, BrC=CH*H*), 5.64 (1H, ddt, *J* 17.1, 10.2 and 7.3, CH2=C*H*), 5.67 (1H, m, BrC=C*H*H); *m/z* (EI) 320 (M+H+, 2%), 319 (11), 274 (18), 239 (100), 229 (13).

### *N*-Allyl-4-methyl-benzenesulfonamide

A solution of tosyl chloride (48.0 g, 0.25 mol) in DCM (50 mL) was added, with stirring at 0oC, to a solution of allylamine (18.8 mL, 0.25 mol) and triethylamine (30.3 g, 0.30 mol) in DCM (200 mL), with stirring, at 0oC. The solution was allowed to warm to ambient temperature overnight then washed with saturated NaHCO3 (100 mL), H2O (100 mL), saturated NaHCO3 (100 mL) and brine (100 mL), dried over magnesium sulfate and the solvent removed under reduced pressure affording the amine3 as a white solid (51.7 g, 24.5 mmol, 98%), RfDiethylether:petrolm.p. 61-62oC; H (270 MHz; CDCl3) 2.44 (3H, s, C*H*3), 3.59 (2H, m, C*H*2), 4.56 (1H, brd t, *J* 5.9, N*H*), 5.10 (1H, m, C=CH*H*), 5.17 (1H, m, C=C*H*H), 5.72 (1H, ddt, *J* 17.2, 10.2 and 5.6, C*H*), 7.32 (2H, d, *J* 8.2, Ar*H*), 7.76 (2H, m, Ar*H*); *m/z* (EI) 211 (M+, 6%), 184 (2), 155 (40), 91 (100).

### *N*-Allyl-*N*-(2-bromo-allyl)-4-methyl-benzenesulfonamide 1b

*N*-Allyl-4-methyl-benzenesulfonamide (6.0 g, 30 mmol) was added to a stirred slurry of cesium fluoride (11.8 g, 78 mmol) in dry DMF (150 mL) and the mixture stirred at ambient temperature for 30 min. 2,3-Dibromopropene (4.0 mL, 39 mmol) was then added and the reaction stirred at ambient temperature for 17 h. Diethyl ether (150 mL) and water (500 mL) were added to the reaction mixture and the aqueous layer extracted with diethyl ether (3 x 150 mL). The organic layers were combined, dried over magnesium sulfate and solvent removed under reduced pressure. Column chromatography eluting with diethyl ether/petrol (1:9) afforded the bromodiene as a white solid3 (7.95 g, 24.1 mmol, 80%), RfDiethylether:petrolm.p. 44-45oC;  (400 MHz; CDCl3) 2.43 (3H, s, C*H*3), 3.84 (2H, d, *J* 6.6, C*H*2CH), 4.02 (2H, s, C*H*2CBr), 5.10-5.18 (2H, m, C*H*2=CH), 5.57 (1H, m, C*H*), 5.60 (1H, m, CBrCH*H*), 5.85 (1H, m, CBrC*H*H), 7.31 (2H, d, *J* 8.1, Arom. CH), 7.73 (2H, d, *J* 8.1, Arom. CH); *m/z* (CI) 330 (M+, 98%), 250 (100), 176 (53), 155 (95).

### 3-Allyloxy-2-bromo-propene 1c

Sodium hydride (60% dispersion, 10.0 g, 0.25 mol) was added cautiously to a mixture of allyl alcohol (14.5 g, 0.25 mol) and 2,3-dibromopropene (12.2 mL, 125 mmol) in dry THF (125 mL) at 0oC. When the initial reaction had subsided the solution was allowed to warm to room temperature over 2 hours. Water (250 mL) was added and the mixture was extracted with diethyl ether (3x100 mL). The organic extracts were washed with sat. NaHCO3 (150 mL) and then brine (150 mL). The extracts were dried over magnesium sulfate and solvent removed under reduced pressure. Column chromatography (gradient of petrol to 5% diethyl ether/petrol) afforded the bromodiene as a colourless oil4 (8.2 g, 46.3 mmol, 37%), RfDiethylether:hexanesmax 2854, 1640;  (270 MHz; CDCl3) 4.04 (2H, dt, *J* 5.6 and 1.2, OC*H*2CH), 4.10 (2H, t, *J* 1.2, OC*H*2C), 5.22 (1H, ddt, *J* 10.8, 1.6 and 1.3, CHCH*H*), 5.31 (1H, ddt, *J* 16.2, 1.6 and 1.6, CHC*H*H), 5.62 (1H, dt, *J* 1.7 and 1.0, CBrC*H*H), 5.93 (1H, d, *J* 1.7, CBrCH*H*), 5.93 (1H, ddt, *J* 19.0, 10.1 and 5.6, C*H*CH2); *m/z* (CI) 135 (M – C3H5, 12%), 119 (M – OC3H5, 16), 97 (M – Br, 23), 85 (63), 57 (100).

### General Procedure for Cyclisation-Carbonylation Reactions (Tables 1 and 2)

Pd2dba3.CHCl3 (6.5 mg, 0.00625 mmol), NaOAc (41 mg, 0.5 mmol), the phosphine (30 mol%) and the substrate (if a solid, 0.25 mmol, 1 eq.) were added directly to the reaction tube under nitrogen. DMF (1 mL) was added and then the substrate (if an oil, 0.25 mmol, 1 eq.). The solution was degassed via 2-freeze-vacuum-thaw cycle’s backfilling with nitrogen. The reaction tube was placed in the reaction vessel and the vessel sealed. The vessel was pressurised to 2 atm with CO and vented, repeating twice. The vessel was pressurised to 2 atm. and then heated at 80oC for 24h with stirring.

### General Procedure for Cyclisation-Carbonylation Reactions (Table 3)

Palladium salt (0.0125 mmol), phosphine and the substrate (if a solid, 0.25 mmol, 1 eq.) were added directly to the reaction tube under nitrogen. DMF (1.94 mL, 100 eq.), MeOH (when required, 0.51 mL, 50 eq.), H2O (22.5 L, 5 eq.) and triethylamine (140 L, 4 eq.) were added followed by the substrate (if an oil, 0.25 mmol, 1 eq.). The solution was degassed via 2-freeze-vacuum-thaw cycle’s backfilling with nitrogen. The reaction tube was placed in the reaction vessel and the vessel sealed. The vessel was pressurised to 2 atm with CO and vented, repeating twice. The vessel was pressurised to 2 atm. and then heated at 85oC for 24h with stirring.

### General work-up procedure for acid products

Pressure was released and the solution filtered through celite, washing with DCM. Solvent was removed under reduced pressure then the residue was taken up in DCM (5 mL) and extracted with aqueous sodium hydroxide (0.05M, 3 x 5 mL). The aqueous layer was acidified (HCl, 1M) and extracted with DCM (3 x 5 mL). Organics were dried over magnesium sulfate and solvent removed under reduced pressure to yield the acid products. The original organic layer can be dried and solvent removed to check by NMR for any unreacted starting material and/or -hydride elimination product.

### General work-up procedure for ester products

Pressure was released and the solution was washed with diethyl ether (5 mL) and water (10 mL). The aqueous layer was extracted with ether (3 x 5 mL). Organics were dried over magnesium sulfate and solvent removed under reduced pressure. Column chromotography afforded the desired products.

### 3,4-Dimethylene-cyclopentane-1,1-dicarboxylic acid diethyl ester 11a

Colourless oil,1 (250 MHz; CDCl3) 1.23 (6H, t, *J* 7.2, CH2C*H*3), 3.02 (4H, t, *J* 1.8, CC*H*2), 4.18 (4H, q, *J* 7.2, C*H*2CH3), 4.95 (2H, s, C=CH*H*), 5.38 (2H, t, *J* 2.1, C=C*H*H); *m/z* (EI, GCMS) 238 (10), 193 (10), 164 (35), 91 (100).

### 2-Allyl-2-ethoxycarbonyl-4-methylene-pentanedioic acid 1-ethyl ester 8a

Colourless oil, max (DCM) /cm-1 2985, 1727, 1699, 1626;(270 MHz; CDCl3) 1.24 (6H, t, *J* 7.3, C*H*3), 2.62 (2H, d, *J* 7.3, CHC*H*2), 2.96 (2H, s, CCH2), 4.15 (4H, m, C*H*2CH3), 5.11 (2H, m, CH=C*H*2), 5.73 (1H, m, CH), 5.81 (1H, d, *J* 1.2, C=C*H*H), 6.44 (1H, d, *J* 1.3, C=CH*H*);C NMR (68 MHz; CDCl3) 14.0 (2q), 33.4 (t), 37.5 (t), 57.5 (s), 61.4 (2t), 119.3 (t), 131.5 (t),132.5 (d), 135.3 (s), 170.6 (2s), 172.1 (s); *m/z* (CI) 285 (M+H+, 15%), 267 (42), 239 (75), 221 (100), (Found: M+H+, 285.1339. C14H20O6 requires M+H+, 285.1338).

### 3-Carboxymethyl-4-methylene-cyclopentane-1,1-dicarboxylic acid diethyl ester 2a

Colourless oil,max (CDCl3)/cm-1 3081, 2984, 2930, 1725, 1660;  (270 MHz; CDCl3) 1.25 (3H, t, *J* 7.2, CH3), 1.25 (3H, t, *J* 7.2, CH3), 1.95 (1H, dd, *J* 13.2 and 10.2, CCH*H*CH), 2.39 (1H, dd, *J* 16.1 and 9.1, C*H*HCO2H), 2.68 (1H, dd, *J* 16.1 and 5.3 Hz, CH*H*CO2H), 2.69 (1H, m, CCH*H*CH), *2*.89-3.10 (3H, m, 3 allylic CH), 4.13 (2H, q, *J* 7.2, OCH2), 4.14 (2H, q, *J* 7.2, OCH2), 4.85 (1H, m, C=CH*H*), 4.99 (1H, m, C=C*H*H); C (68 MHz; CDCl3) 14.0 (2q), 38.2 (t), 38.5 (d), 39.8 (t), 40.7 (t), 58.4 (s), 61.6 (2t), 100.0 (s), 106.9 (t), 150.4 (s), 171.6 (2s); *m/z* (CI) 285 (M+H+, 9%), 267 (13), 239 (53), 211 (80), 153 (73), 84 (100), (Found: M+H+, 285.1339. C14H20O6 requires M+H+, 285.1338).

### 2-{Allyl-(toluene-4-sulfonyl)-amino]-methyl}-acrylic acid 8b

White solid, Rf 0.30 (Et2O:Petrol, 1:3);max (solid)/cm-1 2924, 2581, 1702, 1686; H (270 MHz; CDCl3) 2.44 (3H, s, CH3), 3.82 (2H, d, *J* 6.6, C*H*2CH), 3.99 (2H, s, CH2C), 5.11 (2H, m, CH=C*H*2), 5.57 (1H, m, CH), 7.32 (2H, d, *J* 8.2, Arom. H), 6.06 (1H, d, *J* 0.8, C=C*H*H), 6.51 (1H, d, *J* 0.8, C=CH*H*), 7.72 (2H, m, Arom. H); C (101 MHz; CDCl3) 21.6 (q), 46.6 (t), 51.3 (t), 119.8 (t), 127.3 (2d), 129.8 (2d), 130.0 (t), 132.3 (d), 135.0 (s), 136.9 (s), 143.6 (s), 171.0 (s); *m/z* (CI) 310 (M+CH5+, 5%), 296 (M+H+, 65), 278 (100), 252 (6), 238 (19), 224 (18), 212 (36), (Found: M+H+ 296.0949, C14H18NO4S requires M+ 296.0957).

### [4-Methylene-1-(toluene-4-sulfonyl)-pyrrolidin-3-yl]acetic acid 2b

White Solid, Rf 0.30 (35% Et2O:Petrol), m.p. 126-127oC (petrol/EtOAc);max (solid)/cm-1 1693, 1666, 1341, 1152; H (400 MHz; CDCl3) 2.39 (1H, dd, *J* 16.5 and 9.0, C*H*HCO2H), 2.44 (3H, s, Me), 2.60 (1H, dd, *J* 16.5 and 4.8, CH*H*CO2H), 3.59 (1H, dd, *J* 9.0 and 6.4, NC*H*HCH), 3.01 (1H, m, NCH*H*CH), 3.02 (1H, m, CH), 3.80 (2H, m, NCH2C), 4.94 (1H, d, *J* 1.8, C=C*H*H), 5.00 (1H, d, *J* 1.8, C=CH*H*), 7.34 (2H, d, *J* 7.9, Arom. H), 7.71 (2H, d, *J* 7.9, Arom. H); C (101 MHz; CDCl3) 21.66 (q), 36.8 (t), 38.9 (d), 52.0 (t), 53.4 (t), 107.9 (t), 127.9 (2d), 129.9 (2d), 132.5 (s), 144.0 (s), 146.4 (s); *m/z* (CI) 296 (M+H+, 45%), 278 (100), 236 (11) ), (Found: M+H+ 296.0952, C14H18NO4S requires M+ 296.0957).

### [4-Methylene-1-(toluene-4-sulfonyl)-pyrrolidin-3-yl]acetic acid methyl ester, 2b (methyl ester)

White Solid, Rf 0.35 (Et2O:Petrol, 1:1), m.p. 100-101oC (petrol/EtOAc);max (solid)/cm-1 1734, 1344, 1160; H (400 MHz; CDCl3)2.33 (1H, dd, *J* 16.5 and 8.8, C*H*HCO2Me), 2.44 (3H, s, CO2Me), 2.54 (1H, dd, *J* 16.5 and 4.8, CH*H*CO2Me), 2.98 (1H, dd, *J* 6.6 and 8.8, NC*H*HCH), 3.01 (1H, m, CH), 3.56 (1H, dd, *J* 8.8 and 6.6, |NCH*H*CH), 3.67 (3H, s, CH3), 3.82 (2H, m, NCH2), 4.90 (1H, m, C=C*H*H), 4.97 (1H, m, C=CH*H*), 7.34 (2H, d, *J* 8.0, Arom. H), 7.70 (2H, d, *J* 8.0, Arom. H); C (101 MHz; CDCl3)21.6 (q), 37.0 (t), 39.2 (d), 51.8 (q), 52.0 (t), 53.4 (t), 107.6 (t), 127.9 (2d), 129.8 (2d), 132.8 (s), 123.8 (s), 146.7 (s), 172.0 (s); *m/z* (EI) 309 (M+, 6), 278 (18), 236 (58), 154 (100); (Found: C, 58.35; H, 6.01; N, 4.45. C15H20NO4S requires C, 58.23; H, 6.19; N, 4.53).

### 2-Allyloxymethyl-acrylic acid, 8c

A colourless liquid, max (neat)/cm-1 2862, 1695, 1634; H (270 MHz; CDCl3)4.07 (2H, m, OC*H*2CH), 4.21 (2H, m, OCH2C), 5.22 (1H, ddt, *J* 10.3, 1.6 and 1.3, CHCH*H*), 5.31 (1H, ddt, *J* 17.3, 1.6 and 1.6, CHC*H*H), 5.95 (1H, ddt, *J* 17.5, 10.6 and 5.3, CH), 6.02 (1H, td, *J* 1.6 and 1.3, CC*H*H), 6.46 (1H, dt, *J* 1.3 and 1.3, CCH*H*); H (101 MHz; CDCl3)67.9 (t), 71.8 (t), 117.5 (t), 128.4 (t), 134.4 (s), 136.6 (d), 171.2 (s). *m/z* (CI) 160 (M+NH4+, 100%), (Found: M+NH4+, 160.0974. C7H14NO3 requires M+NH4+, 160.0974).

### 2-Allyloxymethyl-acrylic acid methyl ester, 8c (Methyl ester)

A colourless liquid, max (neat)/cm-1 2954, 2858, 1718, 1638; H (270 MHz; CDCl3)3.77 (3H, s, CH3), 4.05 (2H, m, OC*H*2CH), 4.20 (2H, m, OCH2C), 5.25 (2H, m, CHC*H*2), 5.90 (1H, m, C=C*H*H), 5.93 (1H, m, CH), 6.31 (1H, m, C=CH*H*); C (101 MHz; CDCl3)51.9 (q), 68.3 (t), 71.8 (t), 117.2 (t), 125.9 (t), 134.5 (d), 137.2 (s), 166.2 (s). *m/z* 174 (M+NH4+, 100%), 157 (45), (Found: M+H+, 157.0866. C8H13O3 requires M+H+, 157.0864).

### (4-methylene-tetrahydro-furan-3-yl)-acetic acid, 2c

Colourless liquid, max (DCM)/cm-1 2251, 1712, 1670; H (300 MHz; CDCl3)2.58 (1H, dd, *J* 16.7 and 9.3, C*H*HCO2H), 2.66 (1H, dd, *J* 16.7 and 5.3, CH*H*CO2H), 3.10 (1H, m, CH), 3.62 (1H, dd, *J* 8.8 and 6.2, OC*H*HCH), 4.15 (1H, dd, *J* 8.8 and 6.8, OCH*H*CH), 4.34 (2H, dd, *J* 3.7 and 1.8, OCH2C), 5.01 (2H, m, C=CH2);H (75 MHz; CDCl3)36.9 (t), 39.7 (d), 71.2 (t), 73.7 (t), 104.7 (t), 150.2 (s), 177.7 (s); *m/z* (CI) 160 (M+NH4+, 100%), (Found: M+NH4+, 160.0975. C7H14NO3 requires M+NH4+, 160.0974).

### (4-methylene-tetrahydro-furan-3-yl)-acetic acid methyl ester, 2c (methyl ester)

Colourless liquid, Rf 0.25 (Et2O:Petrol, 1:3); max (neat)/cm-1 2954, 2846, 1733, 1668; H (400 MHz; CDCl3)2.42 (1H, dd, *J* 16.3 and 9.5, C*H*HCO2Me), 2.60 (1H, dd, *J* 16.1 and 5.5, CH*H*CO2Me), 3.09 (1H, m, CH), 3.58 (1H, dd, *J* 8.8 and 6.3, OC*H*HCH), 3.70 (3H, s, Me), 4.13 (1H, dd, *J* 8.8 and 7.0, OCH*H*CH), 4.33 (2H, m, OCH2C), 4.97 (2H, m, C=CH2); H (101 MHz; CDCl3)37.1 (t), 40.0 (d), 51.8 (q), 71.3 (t), 73.8 (t), 104.5 (t), 150.6 (s), 172.6 (s); *m/z* 174 (M+NH4+, 100%), 157 (80), (Found: M+H+, 157.0864. C7H14NO3 requires M+H+, 157.0864).

**References:**

1)R. Hwu, C. Chen, S. Shiao, *J. Org. Chem.* 1995, **60**, 856-862.

2)R. Grigg, P. Stevenson, T. Worakun, *Tetrahedron* 1988, **44**, 2033-2048.

3)C. Lee, K. Oh, K. Kim, K. Ahn, *Org. Lett.* 2000, **2**, 1213-1216.

4)L. Shi, C. Narula, K. Mak, L. Kao, Y. Xu, R. Heck, *J. Org. Chem.* 1983, **48**, 3894-3900.
